# Supplementary material for: Tracing Inequalities: A Geospatial Study of Women’s Well-Being in the Union Territory of Jammu &amp; Kashmir
Source: Research Square preprint supplement (doi:10.21203/rs.3.rs-7559966/v1), 2025-09-22
Supplement: Supplementary file 1 [file 2fbd770d57884cf615a649ec.docx]

Table 1

| **DEMOGRAPHIC INDICATORS** | SEX RATIO OF TOTAL POPULATION |
| --- | --- |
| SEX RATIO AT BIRTH |
| WOMEN MARRIED BEFORE 18 YEARS OF AGE |
| TEENAGE MOTHERS OR PREGNANT WOMEN |
| **EDUCATIONAL INDICATORS** | WOMEN WITH 10 OR MORE YEARS OF SCHOOLING |
| FEMALE POPULATION (ABOVE 6 YEARS) WHO EVER ATTENDED SCHOOL |
| **HEALTH INDICATORS** | CONTRACEPTIVE USE AMONG MARRIED WOMEN |
| WOMEN RECEIVING AT LEAST FOUR ANC VISITS |
| PROTECTION AGAINST NEONATAL TETANUS |
| WOMEN CONSUMING IFA FOR 100 DAYS OR MORE |
| INSTITUTIONAL DELIVERIES |
| IN ANTENATAL CHECK-UPS IN THE FIRST TRIMESTER |
| POSTNATAL CHECK-UPS WITHIN TWO DAYS OF BIRTH |
| ANEMIA PREVALENCE AMONG WOMEN AGED 15-49 |
| UNDERWEIGHT WOMEN |
| **ESSENTIAL AMENITIES INDICATOR** | HOUSEHOLDS WITH ELECTRICITY |
| HOUSEHOLDS WITH IMPROVED SANITATION FACILITY |
| HOUSEHOLDS USING CLEAN FUEL FOR COOKING |
| HOUSEHOLDS WITH IMPROVED DRINKING WATER FACILITY |
